# Supplementary material for: A Tetranuclear Dysprosium Schiff Base Complex Showing Slow Relaxation of Magnetization
Source: MDPI journal article supplement (doi:10.3390/inorganics10050066), 2022-05-21
Supplement: s1 [file s1]

Supplementary

# A tetranuclear dysprosium Schiff base complex showing slow relaxation of magnetization

Mamo Gebrezgiabher<sup>1,2,3</sup>, Sören Schlittenhardt<sup>4</sup>, Cyril Rajnák<sup>3</sup>, Assefa Sergawie<sup>1,2</sup>, Mario Ruben<sup>4,5,6\*</sup>, Madhu Thomas<sup>1,2\*</sup> and Roman Boca<sup>3</sup>

<sup>1</sup>Department of Industrial Chemistry, College of Applied Sciences, Addis Ababa Science and Technology University, Addis Ababa P.O. Box 16417, Ethiopia.

<sup>2</sup>Center of Excellence in Nanotechnology, Addis Ababa Science and Technology University, Addis Ababa P.O. Box 16417, Ethiopia.

<sup>3</sup>Department of Chemistry, Faculty of Natural Sciences, University of SS Cyril and Methodius 91701 Trnava, Slovakia.

<sup>4</sup>Institute of Nanotechnology, Karlsruhe Institute of Technology, Hermann-von-Helmholtz-Platz 1, D-76344 Eggenstein-Leopoldshafen, Germany.

<sup>5</sup>Institute of Quantum Materials and Technologies (IQMT), Karlsruhe Institute of Technology, Hermann-von-Helmholtz-Platz 1, 76344 Eggenstein-Leopoldshafen, Germany.

<sup>6</sup>Centre Européen de Science Quantique (CESQ); Institut de Science et d'Ingénierie Supramoléculaires (ISIS, UMR 7006), CNRS-Université de Strasbourg, 8 allée Gaspard Monge BP 70028 67083 Strasbourg Cedex, France.

**Table S1.** Selected bond lengths (Å) and bond angles (°) in **1**.

|                |            |
|----------------|------------|
| Dy1--Cl1       | 2.7535(11) |
| Dy2---O1       | 2.379(28)  |
| Dy1--O1        | 2.295(3)   |
| Dy1--O1*       | 2.374(3)   |
| Dy1--O4        | 2.330(3)   |
| Dy1--O5        | 2.495(3)   |
| Dy1--O2        | 2.317(3)   |
| Dy1--N1        | 2.408(3)   |
| Dy1--N2        | 2.493(4)   |
| Dy2--Cl2       | 2.6726(11) |
| Dy2--Cl1*      | 2.8132(11) |
| Dy2--O1*       | 2.380(3)   |
| Dy2--O4        | 2.270(3)   |
| Dy2--O2*       | 2.373(3)   |
| Dy2--O3*       | 2.548(3)   |
| Dy2--N3        | 2.466(4)   |
| Dy2--N4        | 2.500(4)   |
| Dy2--Cl1--Dy1* | 80.12(3)   |
| Dy2--O2--Dy1*  | 99.6(1)    |
| Dy2--O1--Dy1*  | 100.0(1)   |
| Dy2--O1--Dy1   | 107.3(1)   |

|               |          |
|---------------|----------|
| Dy2--O4--Dy1  | 112.6(1) |
| Dy1--O2--Dy1* | 108.9(1) |
| Dy1—Dy2       | 3.582(4) |
| Dy1—Dy2*      | 3.827(4) |
| Dy1—Dy1*      | 3.798(4) |
| Dy1*-- Dy2*   | 3.582(4) |

\* Represents symmetry generated atom.

**Table S2.** Crystal data and structure refinement for **1**.

|                                             |                                                                                                |
|---------------------------------------------|------------------------------------------------------------------------------------------------|
| Empirical formula                           | C <sub>56</sub> H <sub>54</sub> Cl <sub>6</sub> Dy <sub>4</sub> N <sub>8</sub> O <sub>10</sub> |
| Formula weight                              | 1861.77                                                                                        |
| Temperature/K                               | 160.00                                                                                         |
| Crystal system                              | triclinic                                                                                      |
| Space group                                 | P-1                                                                                            |
| a/Å                                         | 10.2003(4)                                                                                     |
| b/Å                                         | 13.8602(5)                                                                                     |
| c/Å                                         | 14.9542(6)                                                                                     |
| α/°                                         | 94.523(3)                                                                                      |
| β/°                                         | 109.362(4)                                                                                     |
| γ/°                                         | 99.861(3)                                                                                      |
| Volume/Å <sup>3</sup>                       | 1944.12(14)                                                                                    |
| Z                                           | 1                                                                                              |
| ρ <sub>calc</sub> /g/cm <sup>3</sup>        | 1.590                                                                                          |
| μ/mm <sup>-1</sup>                          | 4.055                                                                                          |
| F(000)                                      | 892                                                                                            |
| Crystal size/mm <sup>3</sup>                | 0.207 × 0.158 × 0.118                                                                          |
| Radiation                                   | Mo Kα (λ = 0.71073)                                                                            |
| 2θ range for data collection/°              | 3.88 to 56.56                                                                                  |
| Index ranges                                | -13 ≤ h ≤ 13, -17 ≤ k ≤ 18, -19 ≤ l ≤ 19                                                       |
| Reflections collected                       | 22207                                                                                          |
| Independent reflections                     | 9643 [R <sub>int</sub> = 0.0390, R <sub>sigma</sub> = 0.0439]                                  |
| Data/restraints/parameters                  | 9643/0/385                                                                                     |
| Goodness-of-fit on F <sup>2</sup>           | 1.102                                                                                          |
| Final R indexes [I ≥ 2σ (I)]                | R <sub>1</sub> = 0.0353, wR <sub>2</sub> = 0.0865                                              |
| Final R indexes [all data]                  | R <sub>1</sub> = 0.0430, wR <sub>2</sub> = 0.0899                                              |
| Largest diff. peak/hole / e Å <sup>-3</sup> | 2.20/-1.53                                                                                     |

**Table S3.** Results of the Continuous Shape measures calculations for **Dy1** and **Dy2**.

| <b>Dy1</b>                         |        |        |       |        |       |        |          |         |        |       |        |         |
|------------------------------------|--------|--------|-------|--------|-------|--------|----------|---------|--------|-------|--------|---------|
| OP-8                               | HPY-8  | HBPY-8 | CU-8  | SAPR-8 | TDD-8 | JGBF-8 | JETBPY-8 | JBTPR-8 | BTPR-8 | JSD-8 | TT-8   | ETBPY-8 |
| 30.751                             | 23.238 | 14.382 | 9.772 | 2.196  | 2.190 | 14.909 | 26.905   | 2.983   | 1.887  | 4.508 | 10.401 | 24.060  |
| Table S3 (continuation) <b>Dy2</b> |        |        |       |        |       |        |          |         |        |       |        |         |
| OP-8                               | HPY-8  | HBPY-8 | CU-8  | SAPR-8 | TDD-8 | JGBF-8 | JETBPY-8 | JBTPR-8 | BTPR-8 | JSD-8 | TT-8   | ETBPY-8 |
| 30.751                             | 23.238 | 14.382 | 9.772 | 2.196  | 2.190 | 14.909 | 26.905   | 2.983   | 1.887  | 4.508 | 10.401 | 24.060  |

OP-8 OctagonD<sub>8h</sub>, HPY-8 Heptagonal pyramid(C<sub>7v</sub>), HBPY-8 Hexagonal bipyramid(D<sub>6h</sub>), CU-8 Cube (O<sub>h</sub>) SAPR-8 Square antiprism (D<sub>4d</sub>), TDD-8 Triangular dodecahedron(D<sub>2d</sub>), JGBF-8 Johnson gyrobifastigium J26 (D<sub>2d</sub>), JETBPY-8 Johnson elongated triangular bipyramid J14 (D<sub>3h</sub>), JBTPR-8 Biaugmented trigonal prism J50(C<sub>2v</sub>), BTPR-8 Biaugmented trigonal prism(C<sub>2v</sub>), JSD-8 Snub dipheneoid J84 (D<sub>2d</sub>), TT-8 Triakis tetrahedron (T<sub>d</sub>), ETBPY-8 Elongated trigonal bipyramid(D<sub>3h</sub>).

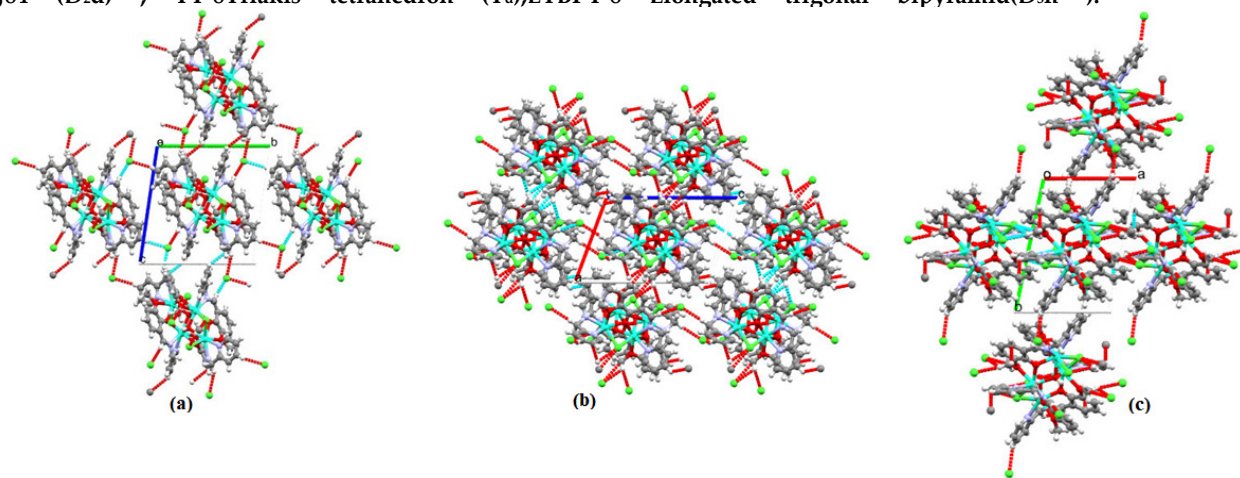

**Figure S1.** View on intermolecular contacts formed in complex 1 through the building of extended networks in the three crystallographic directions (along a, along b and along c).
